# Supplementary material for: Insight into the role of hydrochloric acid in the thermodynamics and nucleation kinetics behavior of Arbidol hydrochloride monohydrate from metastable zone widths
Source: Royal Society of Chemistry journal article supplement (doi:10.1039/d1ce01426a), 2021-11-24
Supplement: d1ce01426a1.pdf [file d1ce01426a1.pdf]

# Supporting Information

## **Insight into the role of hydrochloric acid in the thermodynamics and nucleation kinetics behavior of Arbidol hydrochloride monohydrate from Metastable Zone Widths**

Ting Wen <sup>a,‡</sup>, Hairong Wang <sup>a,‡,\*</sup>, Chunrong Li, Jikun Xu <sup>a,\*</sup>, Chuntao Zhang <sup>a,\*</sup>

<sup>a</sup>School of Chemistry and Chemical Engineering, Wuhan University of Science and Technology, Wuhan Hubei 430081, P. R. China

<sup>‡</sup> These authors contributed equally to this work and should be regarded as co-first authors.

\* Corresponding author: Hairong Wang, Jikun Xu, and Chuntao Zhang

E-mail: [wanghairong@wust.edu.cn](mailto:wanghairong@wust.edu.cn) (H. Wang) ; [jkxu@wust.edu.cn](mailto:jkxu@wust.edu.cn) (J. Xu) and [zhangchuntao@wust.edu.cn](mailto:zhangchuntao@wust.edu.cn) (C. Zhang)

Table S1 Regression results and model parameters of modified Apelblat model of AHM in three solvent systems

| $\omega$ (HCl) | model parameters |          |          | 100ARD | 10 <sup>3</sup> RMSD |
|----------------|------------------|----------|----------|--------|----------------------|
|                | <i>A</i>         | <i>B</i> | <i>C</i> |        |                      |
| 0              | -400.82          | 15035.16 | 60.57    | 1.37   | 0.12                 |
| 0.25%          | -158.42          | 3526.83  | 24.76    | 0.54   | 0.040                |
| 0.5%           | -206.15          | 5483.30  | 31.96    | 0.93   | 0.066                |

Table S2 Comparison of Experimental and Predicted Induction Time of AHM at 303.15 K

| supercooling |                                         | $\omega(\text{HCl})=0\%$                |       | supercooling |                                         | $\omega(\text{HCl})=0.25\%$             |       |
|--------------|-----------------------------------------|-----------------------------------------|-------|--------------|-----------------------------------------|-----------------------------------------|-------|
| $\Delta T$   | $t_{\text{ind}}^{\text{exp}}(\text{s})$ | $t_{\text{ind}}^{\text{cal}}(\text{s})$ | $RD$  | $\Delta T$   | $t_{\text{ind}}^{\text{exp}}(\text{s})$ | $t_{\text{ind}}^{\text{cal}}(\text{s})$ | $RD$  |
| 3.2          | 4457                                    | 3991                                    | 11.68 | 3.3          | 1754                                    | 1876                                    | 6.50  |
| 3.6          | 2490                                    | 2684                                    | 7.21  | 3.8          | 962                                     | 1155                                    | 16.68 |
| 4.2          | 1840                                    | 1597                                    | 15.25 | 4.1          | 806                                     | 889                                     | 9.34  |
| 4.7          | 1251                                    | 1093                                    | 14.46 | 4.7          | 494                                     | 556                                     | 11.11 |
| 5.3          | 940                                     | 729                                     | 28.92 | 5.2          | 460                                     | 393                                     | 17.20 |
| 5.8          | 631                                     | 538                                     | 17.25 | 5.6          | 358                                     | 304                                     | 17.69 |
| 6.4          | 499                                     | 386                                     | 29.19 | 6.1          | 321                                     | 227                                     | 41.62 |

$t_{\text{ind}}^{\text{exp}}$  and  $t_{\text{ind}}^{\text{cal}}$  denote the experimental induction time and calculated by Kubota theory, respectively.

Table S3 *T*-test of  $(T_0/T_{\max})^2 / (T_0 - T_{\max})$  and  $\ln(R/T_0(T_0 - T_{\max}))$  in the aqueous THF system free of HCl

|          | Std. Error<br>Mean | 95% Confidence Interval of the<br>Difference |          | $R_t$   | Significance( <i>P</i> ) |
|----------|--------------------|----------------------------------------------|----------|---------|--------------------------|
|          |                    | Lower                                        | Upper    |         |                          |
|          |                    | 303.15 K                                     | 1.9890   |         |                          |
| 313.15 K | 2.9435             | -41.7879                                     | -25.4430 | -0.9991 | 0.0000339                |
| 323.15 K | 5.6386             | -60.4453                                     | -29.1350 | -0.9980 | 0.0001093                |

Significance Level  $\alpha=0.05$

$R_t$  represents the significance test of correlation coefficient, which becomes a trend of negative correlation.

Table S4 *T*-test of  $(T_0/T_{\max})^2/(T_0-T_{\max})$  and  $\ln(R/T_0(T_0-T_{\max}))$  in different hydrochloric acid contents

| Saturation<br>Temperature | Std. Error<br>Mean | 95% Confidence Interval of the<br>Difference |          | $R_t$   | Significance( <i>P</i> ) |
|---------------------------|--------------------|----------------------------------------------|----------|---------|--------------------------|
|                           |                    | Lower                                        | Upper    |         |                          |
|                           |                    |                                              |          |         |                          |
| 303.15 K                  | 3.6039             | -46.0304                                     | -26.0181 | -0.9985 | 0.00006973               |
|                           | 2.4756             | -36.9025                                     | -23.1556 | -0.9985 | 0.00007012               |
|                           | 1.9890             | -32.2673                                     | -21.2225 | -0.9957 | 0.0003367                |
| 313.15 K                  | 6.5822             | -63.0119                                     | -26.4618 | -0.9953 | 0.0003919                |
|                           | 3.9063             | -48.3567                                     | -26.6652 | -0.9953 | 0.0003885                |
|                           | 2.9435             | -41.7879                                     | -25.4430 | -0.9991 | 0.00003388               |
| 323.15 K                  | 22.8293            | -149.4814                                    | -22.7126 | -0.9954 | 0.0003691                |
|                           | 10.6330            | -84.9824                                     | -25.9383 | -0.9963 | 0.0002722                |
|                           | 5.6386             | -60.4453                                     | -29.1350 | -0.9980 | 0.0001093                |

Significance Level  $\alpha=0.05$

$R_t$  represents the significance test of correlation coefficient, which becomes a trend of negative correlation.

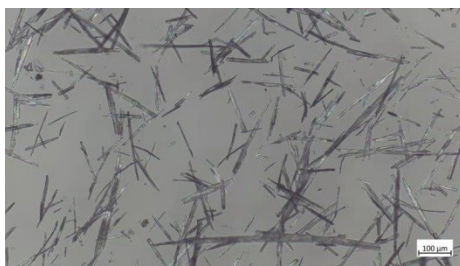

Fig.S1 SEM of the powder product of AHM re-crystallized from water and THF binary-solvents

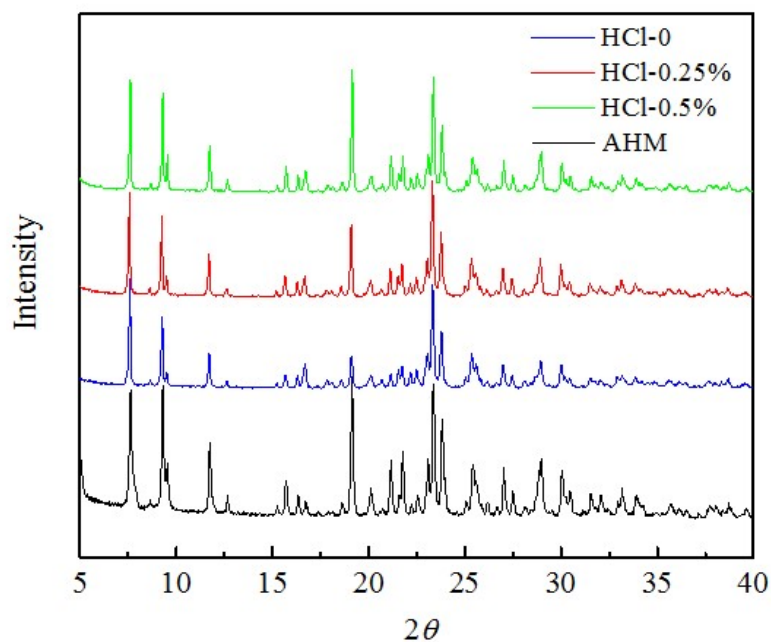

Fig.S2 PXRD patterns of the powder product of AHM re-crystallized from water and THF binary-solvents with different HCl contents

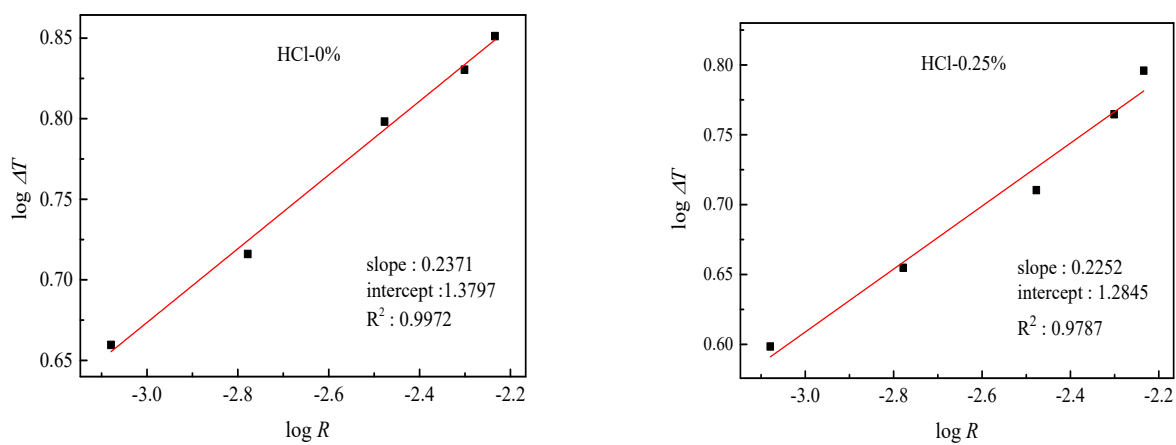

Fig.S3 Slopes and intercepts estimated from MSZW data at 303.13K, using Kubota's theory.
